# Supplementary material for: Conducting and superhydrophobic hybrid 2D material from coronene and pyrene
Source: Royal Society of Chemistry journal article supplement (doi:10.1039/d1tc02334a), 2021-01-01
Supplement: d1tc02334a1.pdf [file d1tc02334a1.pdf]

## Supporting Information

# Conducting and Superhydrophobic Hybrid 2D Material from Coronene and Pyrene

*Jyothibabu Sajila Arya,<sup>1</sup> Malay Krishna Mahato,<sup>1</sup> Sethuraman Sankararaman<sup>1\*</sup> and  
Edamana Prasad<sup>1\*</sup>*

<sup>1</sup> Department of Chemistry, Indian Institute of Technology, Madras, Tamilnadu 600036, India

E-mail: [pre@iitm.ac.in](mailto:pre@iitm.ac.in), [sanka@iitm.ac.in](mailto:sanka@iitm.ac.in)

### Table of contents

| Sl. No. | Figure caption                                                                                                                 | Page No. |
|---------|--------------------------------------------------------------------------------------------------------------------------------|----------|
| 1       | <b>Figure S1:</b> SEM-energy dispersive X-ray spectrometry (EDS) of bulk COPY powder                                           | 2        |
| 2       | <b>Figure S2:</b> Thermogravimetric analysis (TGA) of bulk COPY powder                                                         | 3        |
| 3       | <b>Figure S3:</b> Nitrogen adsorption-desorption isotherm and pore size distribution of COPY                                   | 3        |
| 3       | <b>Figure S4:</b> Density of states (DOS) for optimized geometry of the COPY1                                                  | 4        |
| 4       | <b>Figure S5:</b> Impedance spectrum of bulk COPY powder                                                                       | 4        |
| 5       | <b>Figure S6:</b> Colour changes from pristine melamine sponge (MS) to TEP coated MS followed by COPY incorporated MS (COPYMS) | 5        |
| 6       | <b>Figure S7:</b> Photograph of COPY incorporated melamine sponge (COPYMS) and pristine melamine sponge (MS) in water          | 5        |
| 7       | <b>Figure S8&amp;9:</b> Oil-water separation using COPYC                                                                       | 6        |

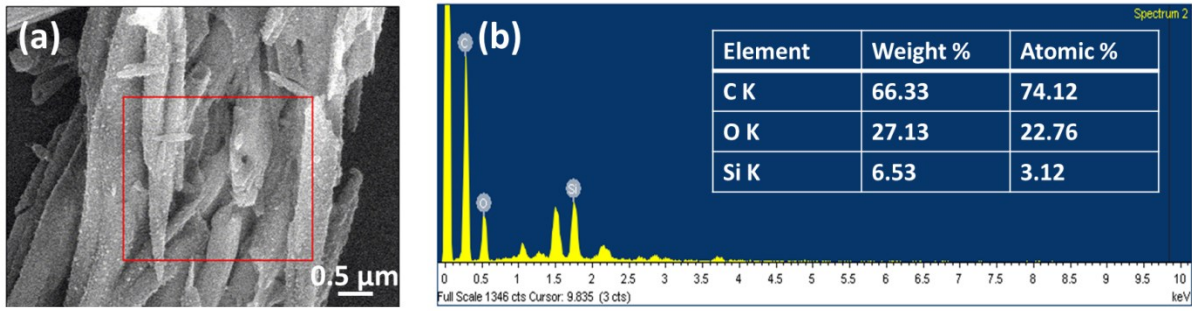

**Figure S1.** (a) SEM image used for energy dispersive X-ray spectrometry (EDS) and (b) EDS of bulk COPy (Substrate used for analysis: Silicon wafer)

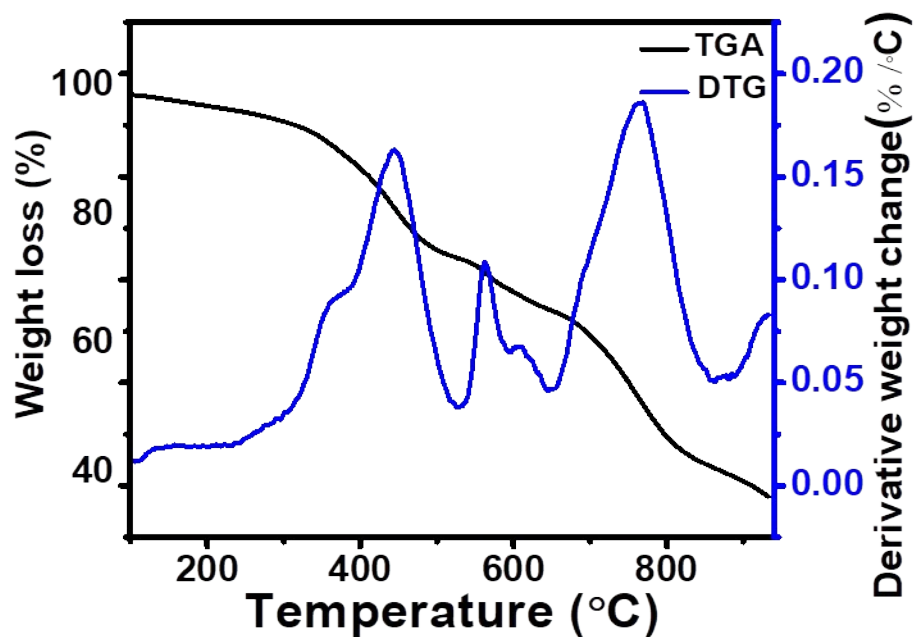

Figure S2. Thermogravimetric analysis (TGA) depicting the thermal stability of bulk COPY powder

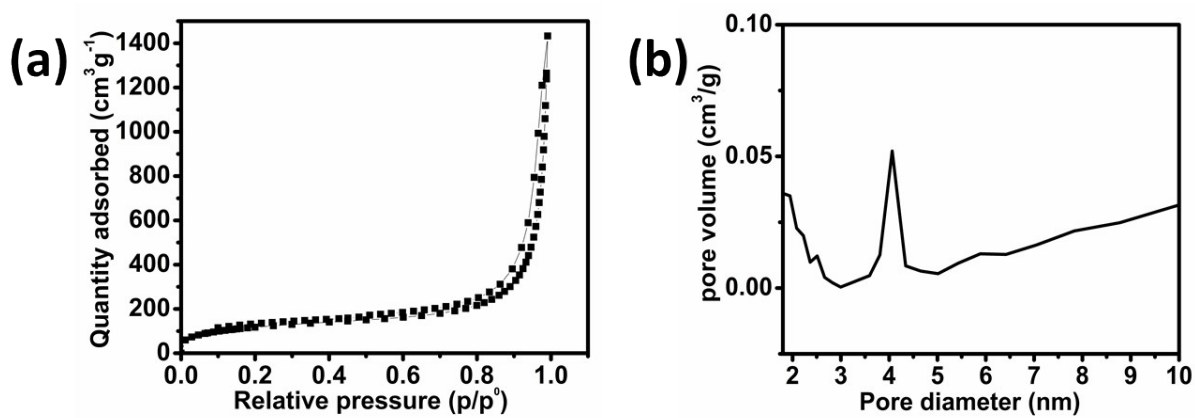

Figure S3. (a) Nitrogen adsorption-desorption isotherm and (b) pore size distribution of COPY

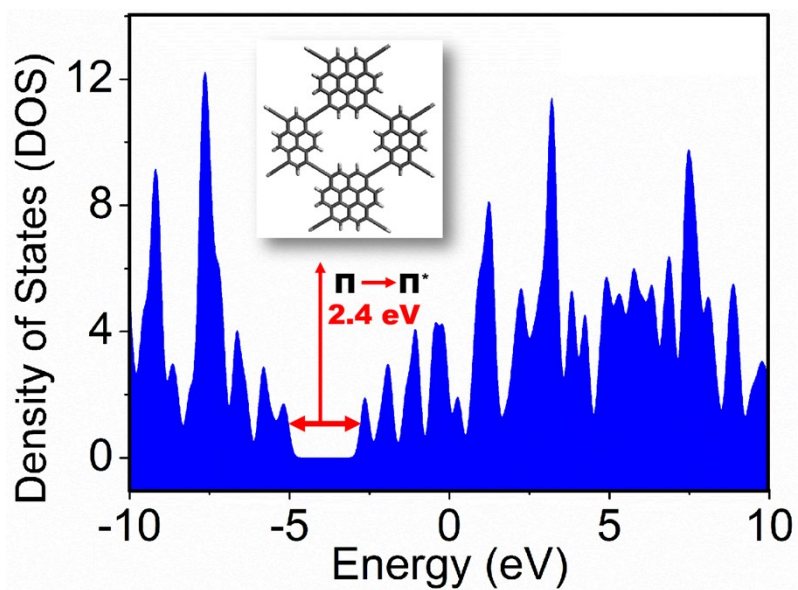

**Figure S4.** Density of states (DOS) for optimized geometry of the COPY1 (with lesser conjugation)

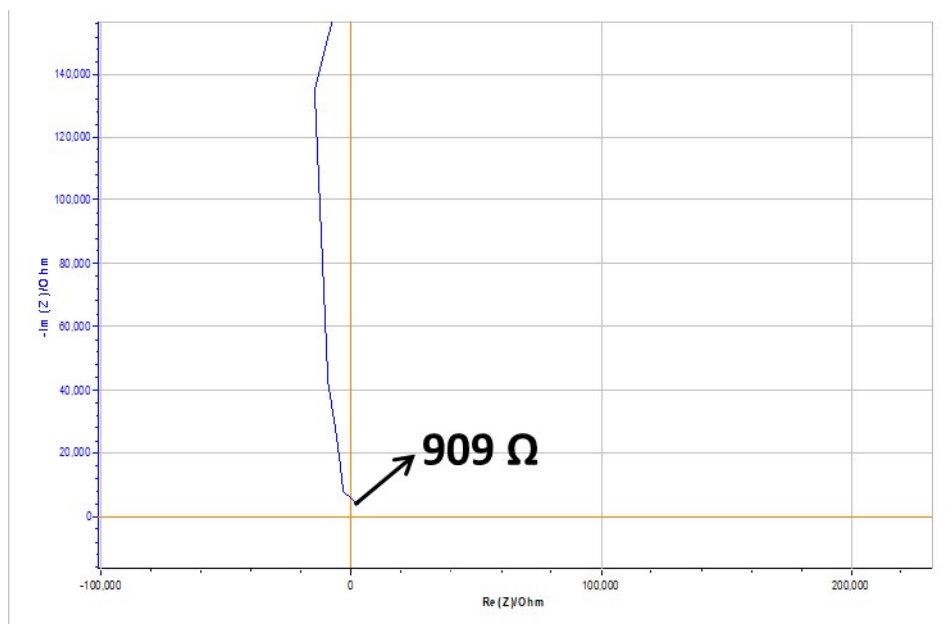

**Figure S5.** Impedance spectrum of bulk COPY powder with an X intercept of 909 Ω

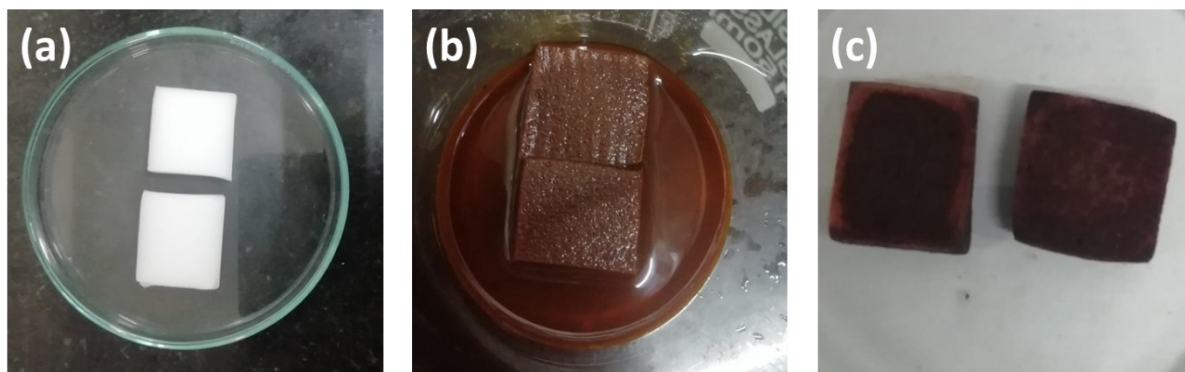

**Figure S6.** Photographs of (a) pristine (b) TEP coated and (c) COPY incorporated melamine sponges

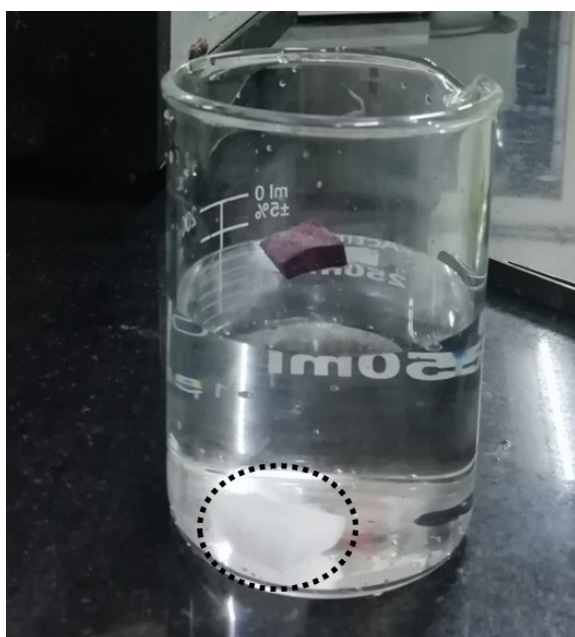

**Figure S7.** Photograph of COPY incorporated melamine sponge (above) floating on water and pristine melamine sponge (below) immersed in water

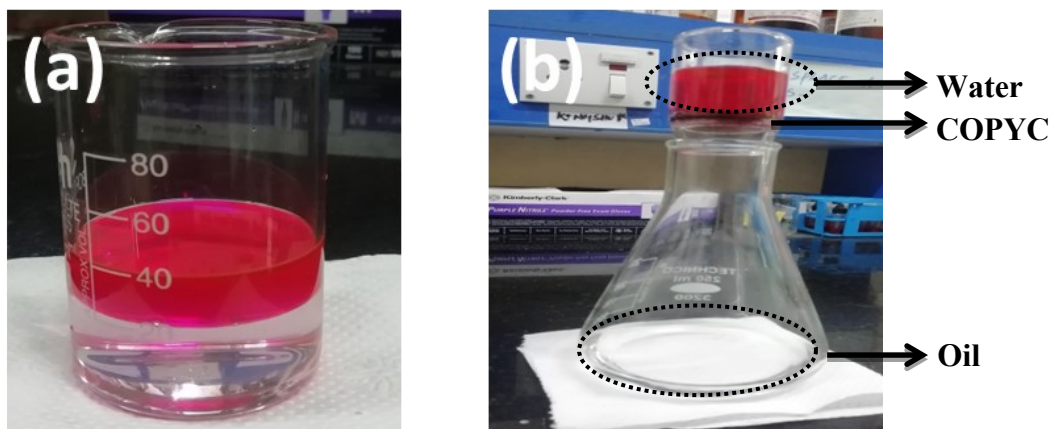

**Figure S8.** Photograph of (a) oil-water mixture (DCM as the representative of heavy oils) (rhodamine B was used as dye for water for better visual appeal) and (b) oil-water separation via COPYC fixed between glasswares (brown layer)

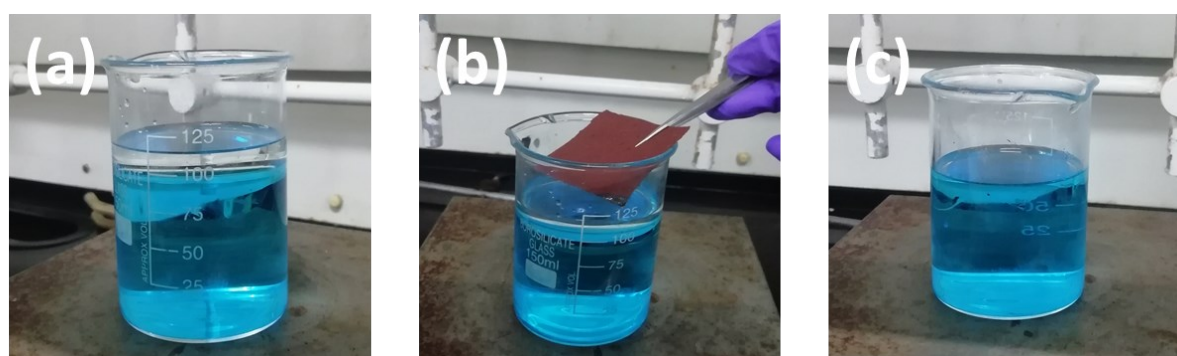

**Figure S9.** Photograph of (a) paraffin oil-water mixture (top layer- paraffin oil and bottom layer- water (methylene blue as dye for better visual appeal) (b) COPYC inserted into oil-water mixture and (c) the layer of water after the removal of paraffin oil
